# Supplementary material for: N-terminal domain on dystroglycan enables LARGE1 to extend matriglycan on α-dystroglycan and prevents muscular dystrophy
Source: eLife journal article supplement (doi:10.7554/elife.82811), 2023-02-01
Supplement: supp [file elife_poa_e82811_Figure_2_figure_supplement_2.pdf › elife_poa_e82811_Figure_2_figure_supplement_2.pdf]

**A****Control****Core  $\alpha$ -DG  
&  $\beta$ -DG**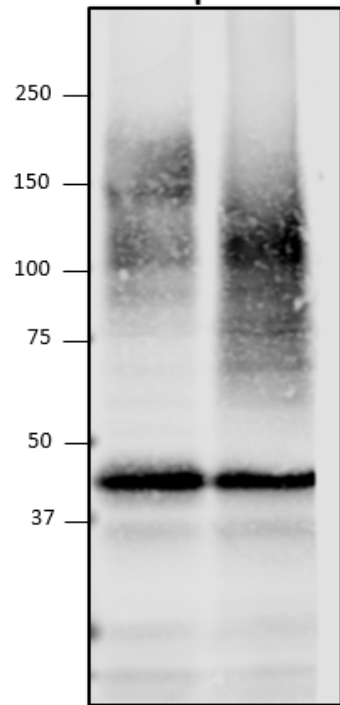**Matriglycan**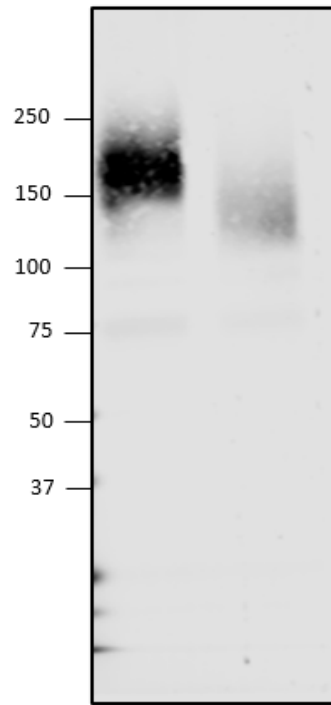**Laminin  
Overlay**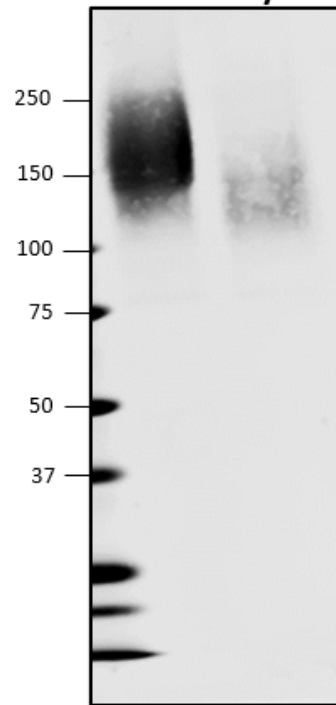 $T_0$  (BGUS+XylS)  
 $T_{0/N}$  (BGUS+XylS) $T_0$  (BGUS+XylS)  
 $T_{0/N}$  (BGUS+XylS) $T_0$  (BGUS+XylS)  
 $T_{0/N}$  (BGUS+XylS)**B****M- $\alpha$ -DGN KO****Core  $\alpha$ -DG  
&  $\beta$ -DG**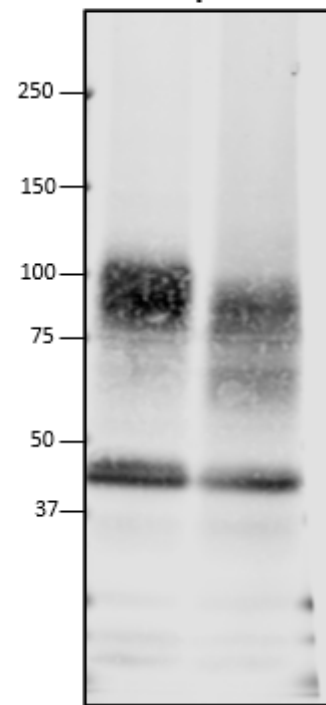**Matriglycan**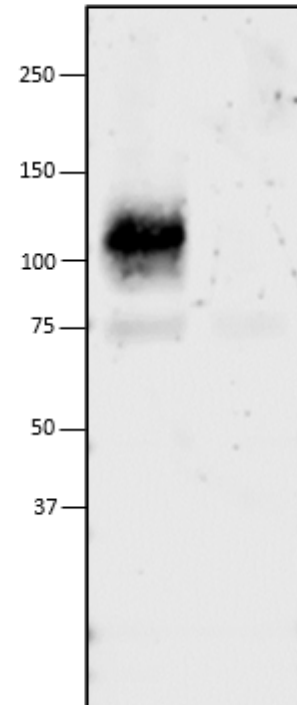**Laminin  
Overlay**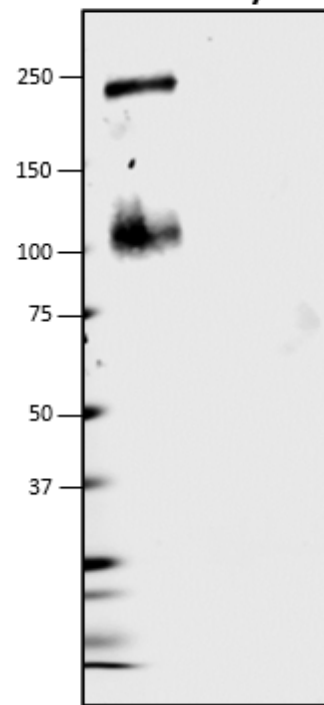 $T_0$  (BGUS+XylS)  
 $T_{0/N}$  (BGUS+XylS) $T_0$  (BGUS+XylS)  
 $T_{0/N}$  (BGUS+XylS) $T_0$  (BGUS+XylS)  
 $T_{0/N}$  (BGUS+XylS)
