# Supplementary material for: N-terminal domain on dystroglycan enables LARGE1 to extend matriglycan on α-dystroglycan and prevents muscular dystrophy
Source: eLife journal article supplement (doi:10.7554/elife.82811), 2023-02-01
Supplement: supp [file elife_poa_e82811_Figure_6_figure_supplement_1.pdf › elife_poa_e82811_Figure_6_figure_supplement_1.pdf]

## Matriglycan

## Core $\alpha$ -DG & $\beta$ -DG

## Laminin Overlay

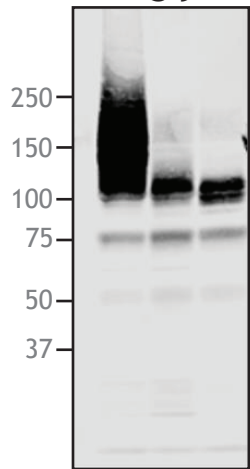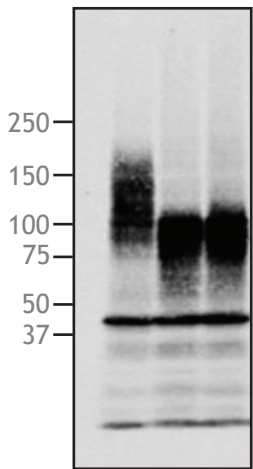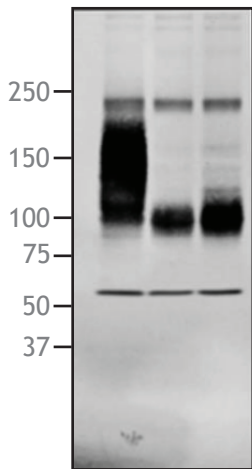

Control  
M- $\alpha$ -DGN KO  
M- $\alpha$ -DGN KO  
+AAV-MCK-mLarge1

Control  
M- $\alpha$ -DGN KO  
M- $\alpha$ -DGN KO  
+AAV-MCK-mLarge1

Control  
M- $\alpha$ -DGN KO  
M- $\alpha$ -DGN KO  
+AAV-MCK-mLarge1
