# Supplementary material for: N-terminal domain on dystroglycan enables LARGE1 to extend matriglycan on α-dystroglycan and prevents muscular dystrophy
Source: eLife journal article supplement (doi:10.7554/elife.82811), 2023-02-01
Supplement: supp [file Figure 5-Supp 1B_8-23-22_red and green_v2.docx]

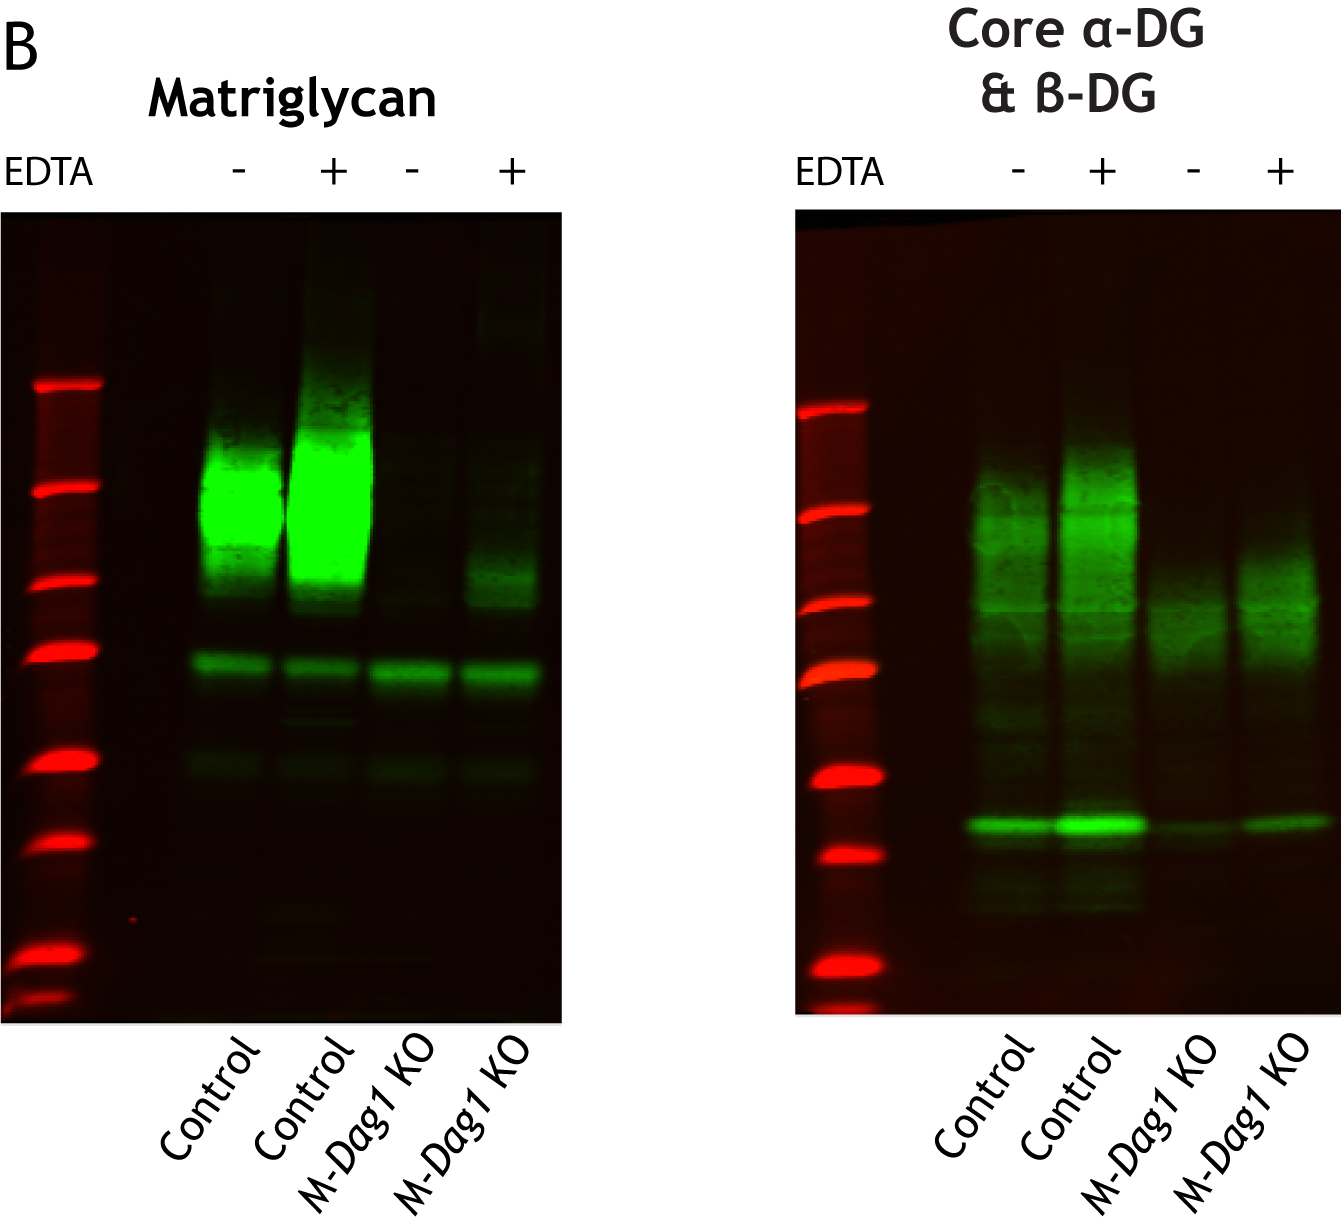


**Figure 5-figure supplement 1. Characteristics of M*-Dag1* KO (*Pax7cre; Dag1flox/flox)* mice. (B)** Immunoblot analysis of skeletal muscle from control and M-*Dag1* KO mice. Glycoproteins were enriched from skeletal muscles using WGA-agarose with (+) and without (-) 10 mM EDTA. Immunoblotting was performed to detect matriglycan (IIIH11) and core α-DG and β-DG (AF6868). Molecular weight standards in kilodaltons (kDa) are shown on the left (250, 150, 100, 75, 50, 37, 25, and 20).
