# Supplementary figures and images for: N-terminal domain on dystroglycan enables LARGE1 to extend matriglycan on α-dystroglycan and prevents muscular dystrophy
Source: eLife journal article supplement (doi:10.7554/elife.82811), 2023-02-01

# Eccentric Contraction

- Control
- M- $\alpha$ -DGN KO
- ▲ Control
- △ M-POMK KO

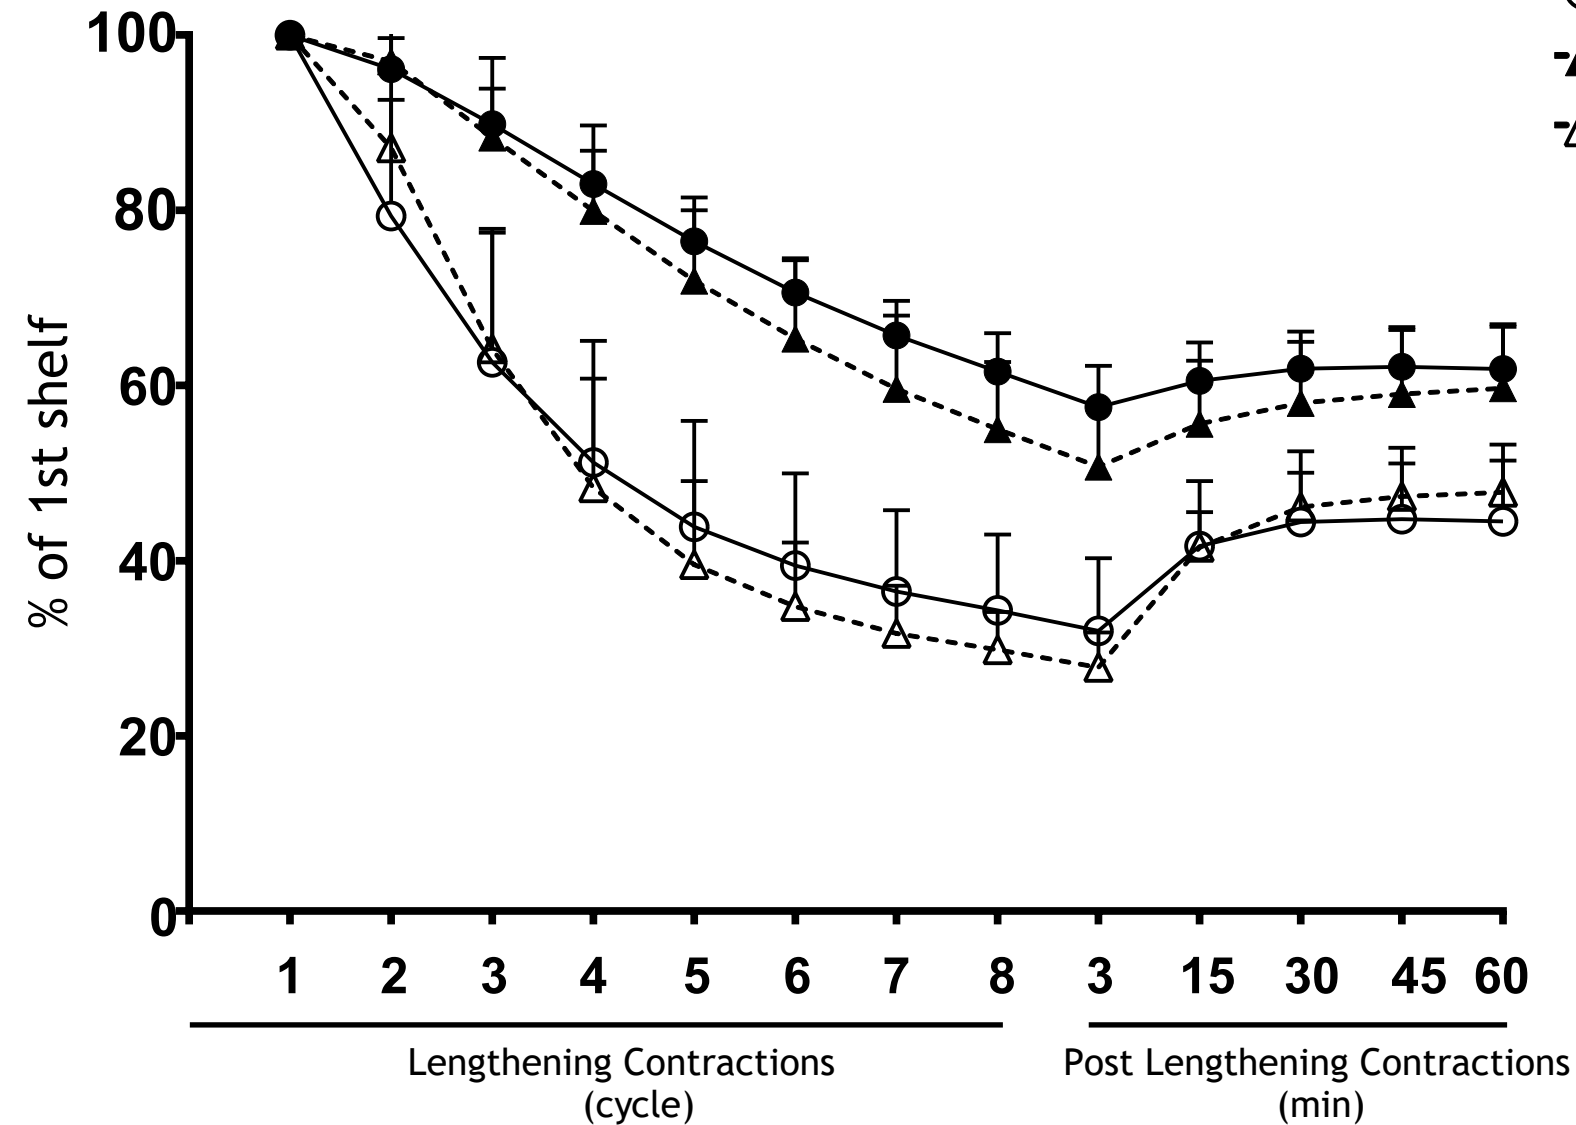

Supplement: supp [file elife_poa_e82811_Figure_4_figure_supplement_1.pdf › elife_poa_e82811_Figure_4_figure_supplement_1.pdf]

A

B-DG/DAPI

Control

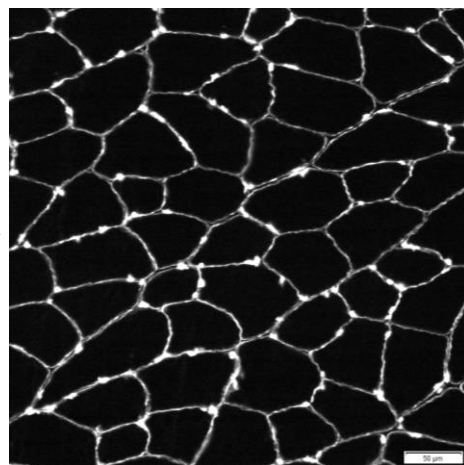

M-Dag1 KO

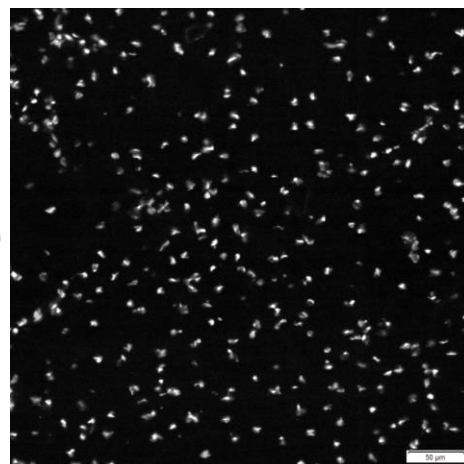

B

Matriglycan

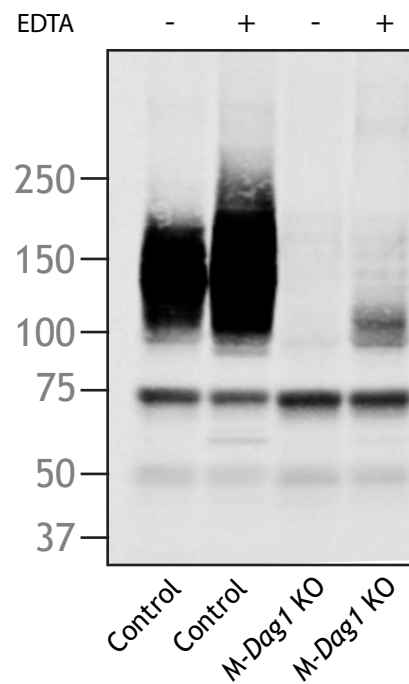Core α-DG  
& B-DG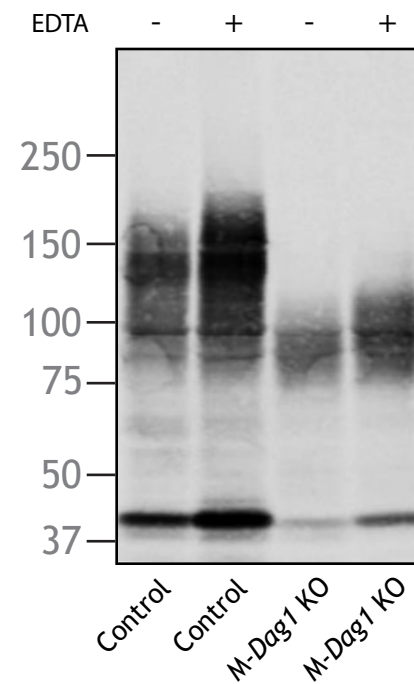

C

Specific Force

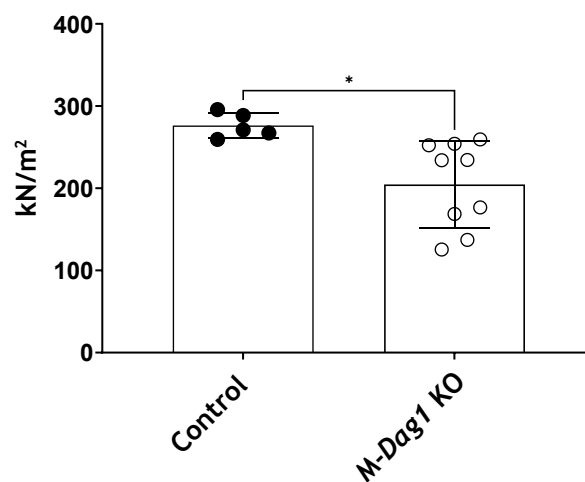

D

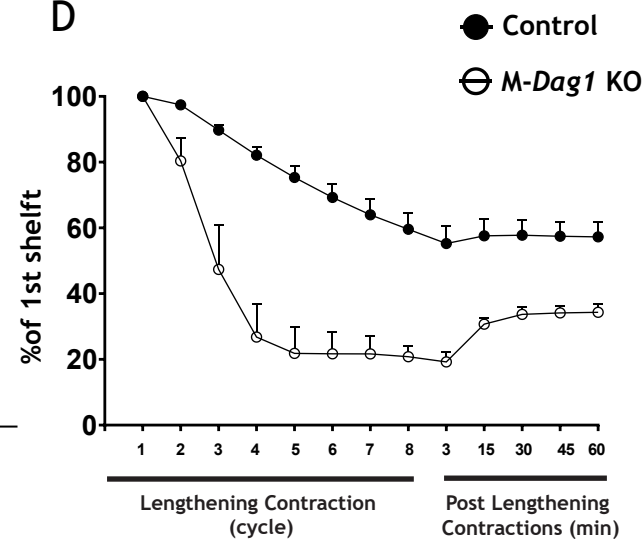

Supplement: supp [file elife_poa_e82811_Figure_5_figure_supplement_1.pdf › elife_poa_e82811_Figure_5_figure_supplement_1.pdf]

# Matriglycan

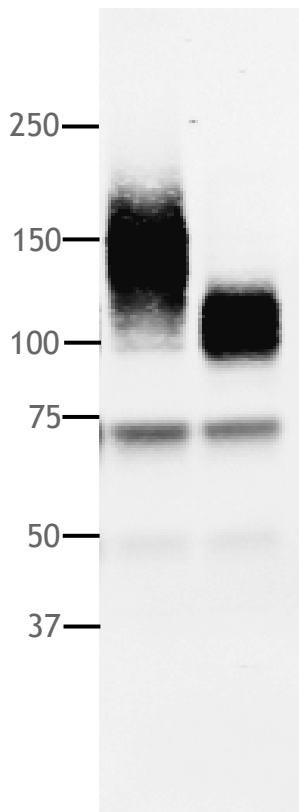

Control

$\alpha$ -DGN Tg

# Core $\alpha$ -DG & $\beta$ -DG

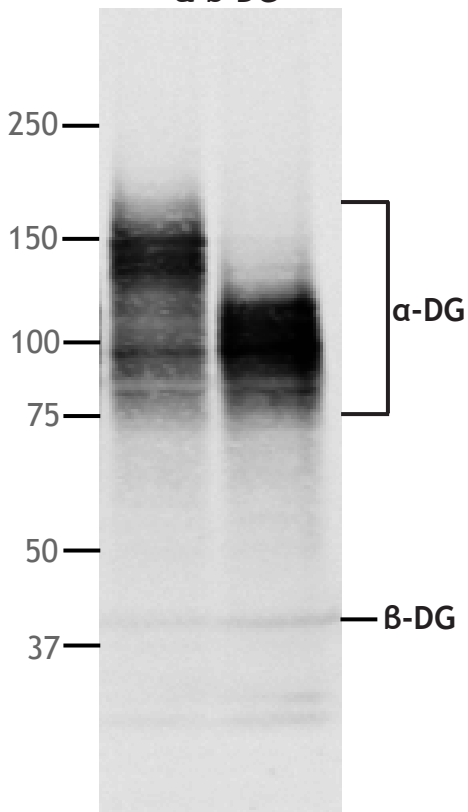

Control

$\alpha$ -DGN Tg

Supplement: supp [file elife_poa_e82811_Figure_5_figure_supplement_2.pdf › elife_poa_e82811_Figure_5_figure_supplement_2.pdf]
